# Supplementary figures and images for: An exploration of the relationship between families of deceased organ donors and transplant recipients: A systematic review and qualitative synthesis
Source: PubMed Central journal article supplement — Health Psychol Open. 2018 Jun 25;5(1):2055102918782172. doi: 10.1177/2055102918782172 (PMC6069040; doi:10.1177/2055102918782172), 2018-06-25

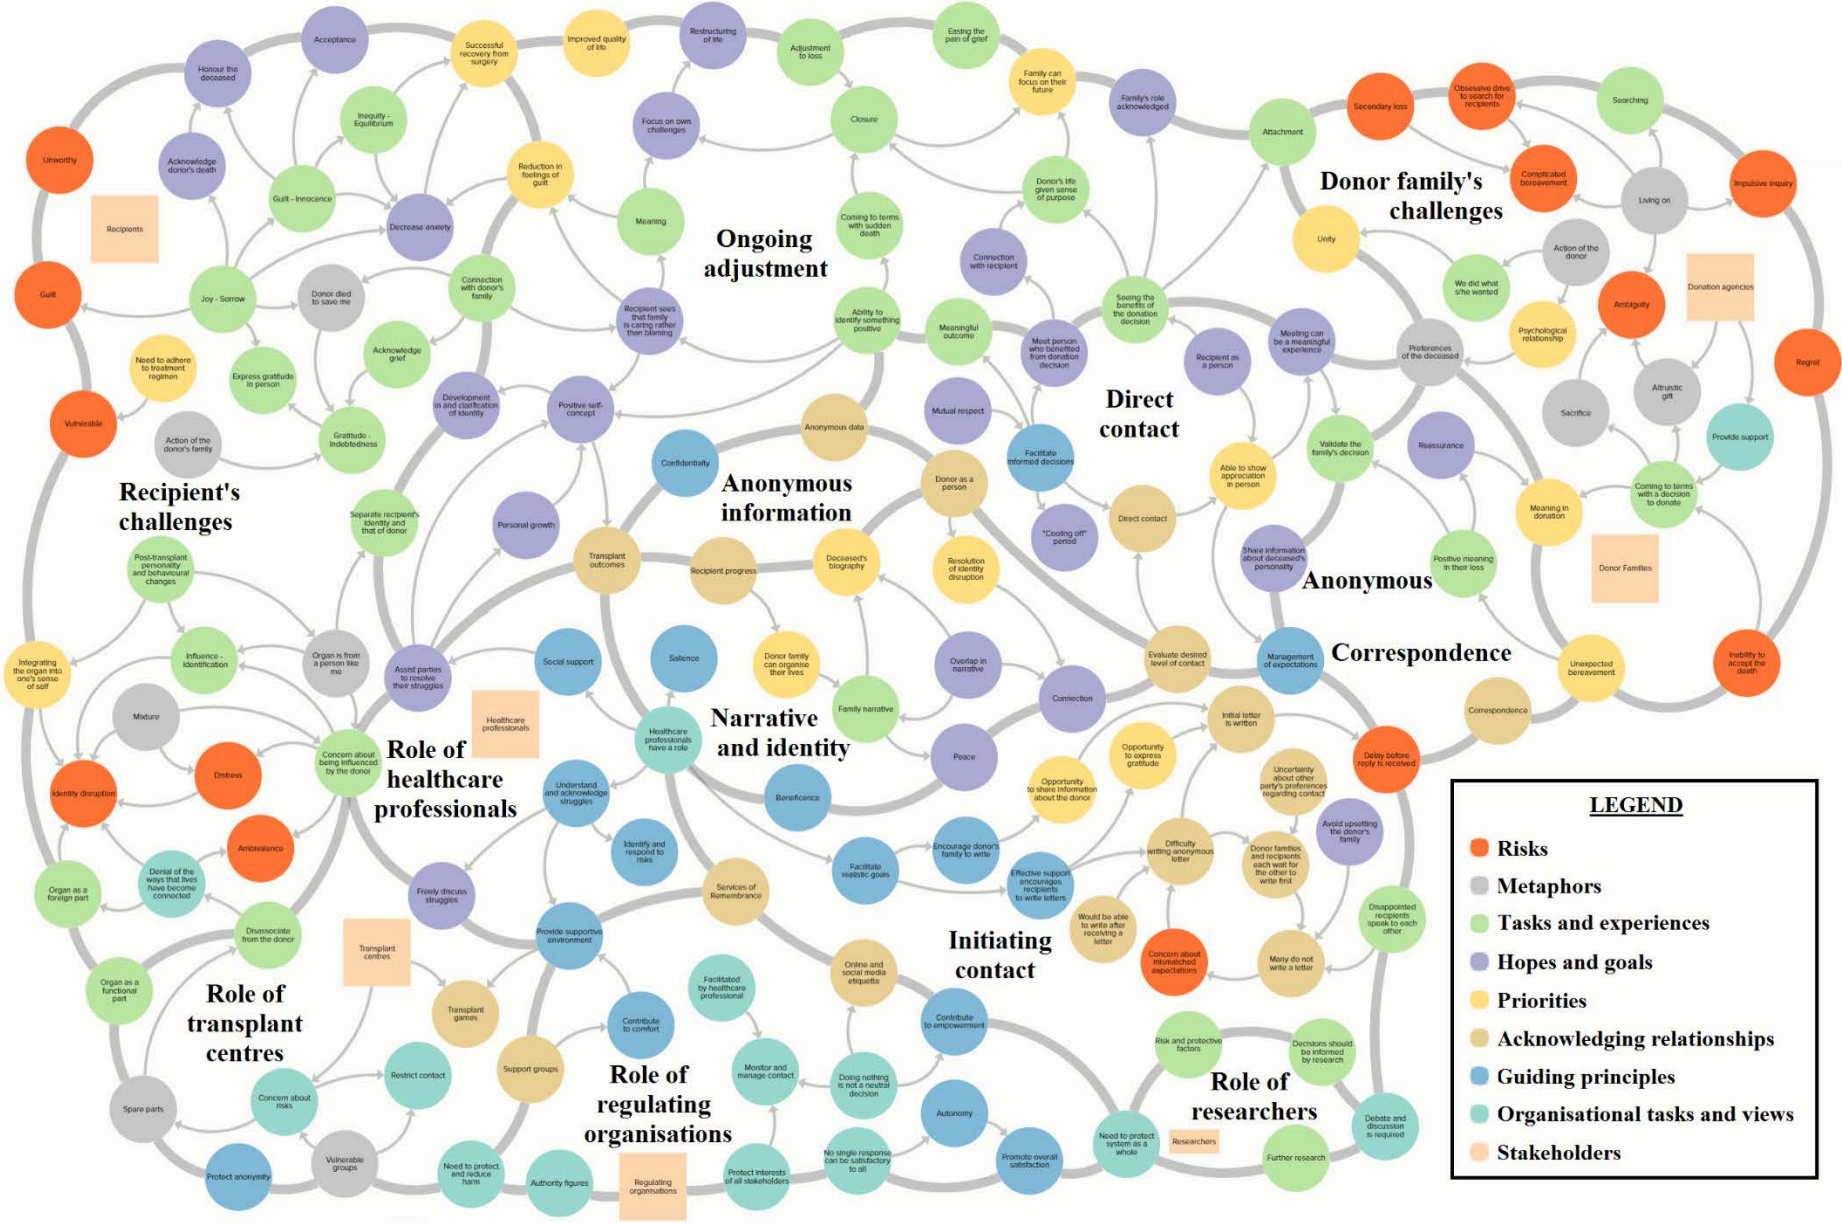

Supplement: Supplementary_File_1_Systemic_Map.pdf [file Supplementary_File_1_Systemic_Map.pdf]
